# Supplementary material for: Do crop diversity and livestock production improve smallholder intra-household dietary diversity, nutrition and sustainable food production? Empirical evidence from Pakistan
Source: Frontiers journal article supplement (doi:10.3389/fsufs.2023.1143774), 2023-03-14
Supplement: Table_1.pdf [file Table_1.pdf]

**Table 1. Male dietary diversity score by Poisson regression**

| Variables                                           | Layyah |            |         | Bhakkar |            |         | Khushab |            |         |
|-----------------------------------------------------|--------|------------|---------|---------|------------|---------|---------|------------|---------|
|                                                     | B      | Std. error | Sig     | B       | Std. error | Sig     | B       | Std. error | Sig     |
| Age                                                 | .005   | .0084      | .515    | .002    | .0080      | .842    | -.009   | .0076      | .237    |
| Farming experience                                  | .012   | .0063      | .049**  | -.003   | .0078      | .737    | .008    | .0080      | .295    |
| Family size                                         | -.058  | .0295      | .048**  | .005    | .0287      | .848    | -.025   | .0272      | 0.095** |
| Farm size                                           | -.023  | .0135      | .161    | .003    | .0118      | .827    | -.098   | .0803      | .224    |
| Family structure<br>1.single 2.Joint                | -.013  | .0071      | .072**  | .020    | .0826      | .806    | -.001   | .0055      | .043**  |
| Distance from city                                  | -.014  | .0153      | .360    | -.028   | .0155      | .070**  | -.027   | .0156      | .087**  |
| Distance from main road                             | -.019  | .0286      | .506    | -.016   | .0303      | .606    | -.095   | .0373      | .002*** |
| Distance from input/output market                   | -.024  | .0114      | .038*** | .004    | .0167      | .827    | .038    | .0161      | .018**  |
| Local market in the village 1. Yes 2. No.           | -.186  | .1452      | .200    | -.161   | .1920      | .401    | .319    | .1717      | .063**  |
| Drinkable water available within 60 minutes in walk | .132   | .2251      | .559    | -.084   | .1984      | .672    | .033    | .1778      | .853    |
| Road to village. 1.Yes2. No                         | .174   | .1161      | .135    | .246    | .2065      | .234    | .029    | .1774      | .871    |
| Crop diversity Index                                | .794   | 1.073      | .038*** | 1.438   | 1.8365     | .078**  | .558    | .2937      | .057**  |
| Income diversity index                              | .629   | .370       | .089**  | .086    | .2970      | .772    | .580    | .2968      | .050**  |
| Family education index                              | -.022  | .255       | .930    | .273    | .2755      | .322    | .324    | .2109      | .124    |
| Cash crop group                                     | .018   | .0131      | .067**  | .011    | .0067      | .099**  | -.008   | .0066      | .234    |
| Pulses crop group                                   | -.014  | .0199      | .480    | -.046   | .0195      | .019*** | .015    | .0191      | .430    |
| Vegetables and fruits group                         | .005   | .0239      | .826    | -.054   | .0224      | .015*** | -.028   | .0215      | .193    |

**Table2. Women DDS by poisson regression**

| Variables                                                 | Layyah |            |         | Bhakkar |            |        | Khushab |            |         |
|-----------------------------------------------------------|--------|------------|---------|---------|------------|--------|---------|------------|---------|
|                                                           | B      | Std. error | Sig     | B       | Std. error | Sig    | B       | Std. error | Sig     |
| Age                                                       | .006   | .0085      | .487    | -.012   | .0081      | .122   | .001    | .0079      | .906    |
| Farming experience                                        | .012   | .0064      | .062**  | .014    | .0078      | .074** | .000    | .0083      | .959    |
| Family size                                               | -.064  | .0299      | .031*** | .003    | .0290      | .913   | -.012   | .0287      | .676    |
| Farm size                                                 | -.013  | .0069      | .054**  | -.003   | .0042      | .521   | .014    | .0060      | .017*** |
| Family structure 1.single<br>2.Joint                      | -.035  | .0782      | .652    | .002    | .0822      | .984   | -.064   | .0854      | .457    |
| Distance from city                                        | -.013  | .0155      | .406    | .011    | .0191      | .567   | -.028   | .0158      | .080**  |
| Distance from main road                                   | -.023  | .0287      | .422    | .027    | .0299      | .368   | .003    | .0375      | .939    |
| Distance from<br>input/output market                      | -.019  | .0116      | .097*   | -.010   | .0196      | .614   | .024    | .0163      | .135    |
| Local market in the<br>village 1. Yes 2. No.              | -.224  | .1446      | .121    | .045    | .2100      | .832   | .137    | .1923      | .476    |
| Drinkable water<br>available within 60<br>minutes in walk | .047   | .2206      | .830    | -.023   | .2056      | .911   | -.016   | .1883      | .932    |
| Road to village. 1.Yes2.<br>No                            | .187   | .1177      | .112    | -.103   | .1765      | .560   | -.383   | .2196      | .081**  |
| Crop diversity Index                                      | .967   | 1.1298     | .392    | -.759   | .4359      | .082** | 2.543   | 1.0557     | .016*** |
| Income diversity index                                    | -.670  | .3665      | .173    | -.297   | .2985      | .320   | -.206   | .3245      | .525    |
| Family education index                                    | .493   | .2479      | .047**  |         |            |        | -.129   | .2294      | .573    |
| Cash crop group                                           | .018   | .0132      | .068**  | .013    | .0064      | .041** | .002    | .0067      | .724    |
| Pulses crop group                                         | -.009  | .0190      | .628    | -.023   | .0194      | .228   | .028    | .0204      | .176    |
| Vegetables and fruits<br>group                            | .014   | .0241      | .572    | -.014   | .0225      | .531   | -.027   | .0228      | .244    |

**Table 3. Adolescents DDS results by poisson regression**

| Variables                                                 | Layyah |            |         | Bhakkar |            |        | Khushab |            |         |
|-----------------------------------------------------------|--------|------------|---------|---------|------------|--------|---------|------------|---------|
|                                                           | B      | Std. error | Sig     | B       | Std. error | Sig    | B       | Std. error | Sig     |
| Age                                                       | .016   | .0088      | .071**  | .014    | .0082      | .099*  | .001    | .0076      | .873    |
| Farming experience                                        | .004   | .0063      | .557    | -.007   | .0080      | .378   | -.003   | .0111      | .776    |
| Family size                                               | .013   | .0301      | .660    | -.014   | .0289      | .617   | .057    | .0271      | .137    |
| Farm size                                                 | .011   | .0066      | .091*   | .008    | .0043      | .065** | .007    | .0058      | .229    |
| Family structure 1.single<br>2.Joint                      | .021   | .0788      | .795    | -.101   | .0810      | .211   | -.144   | .0834      | .084*   |
| Distance from city                                        | .006   | .0146      | .673    | -.002   | .0180      | .929   | .023    | .0189      | .217    |
| Distance from main road                                   | -.077  | .0313      | .013*** | .025    | .0304      | .412   | .047    | .0374      | .211    |
| Distance from<br>input/output market                      | .001   | .0113      | .921    | .023    | .0185      | .215   | -.023   | .0189      | .230    |
| Local market in the<br>village 1. Yes 2. No.              | .315   | .1710      | .065**  | -.042   | .1894      | .823   | -.104   | .1930      | .589    |
| Drinkable water available<br>within 60 minutes in<br>walk | .051   | .2498      | .060**  | -.104   | .2014      | .604   | .182    | .1718      | .055**  |
| Road to village. 1.Yes2.<br>No                            | .159   | .1131      | .160    | -.158   | .1755      | .367   | .312    | .1629      | .289    |
| Crop diversity Index                                      | -.346  | .9159      | .706    | .441    | .4905      | .369   | 1.613   | .9597      | .093*   |
| Income diversity index                                    | .587   | .3818      | .124    | -.206   | .0965      | .086*  | -.065   | .3206      | .840    |
| Family education index                                    |        |            |         | .569    | .3154      | .279   | -.334   | .5189      | .519    |
| Cash crop group                                           | -.008  | .0122      | .487    | -.015   | .0070      | .027** | .010    | .0066      | .146    |
| Pulses crop group                                         | -.026  | .0189      | .164    | .021    | .0196      | .071** | -.011   | .0206      | .594    |
| Vegetables and fruits<br>group                            | .000   | .0250      | .984    | .013    | .0225      | .050** | -.052   | .0222      | .019*** |

**Table 4. Children DDS results of poisson regression**

| Variables                                           | Layyah     |            |       | Bhakkar |            |      | Khushab    |            |       |
|-----------------------------------------------------|------------|------------|-------|---------|------------|------|------------|------------|-------|
|                                                     | B          | Std. error | Sig   | B       | Std. error | Sig  | B          | Std. error | Sig   |
| Age                                                 | -.005      | .0100      | .095  | .004    | .0088      | .646 | -.006      | .0082      | .432  |
| Farming experience                                  | .002       | .0074      | .739  | .000    | .0086      | .954 | .008       | .0119      | .492  |
| Family size                                         | .009       | .0350      | .087  | -.030   | .0313      | .334 | .014       | .0303      | .638  |
| Farm size                                           | -.016      | .0088      | .064  | .006    | .0046      | .185 | -.010      | .0058      | .078  |
| Family structure 1.single<br>2.Joint                | -.073      | .0915      | .024  | .161    | .0914      | .078 | .009       | .0899      | .922  |
| Distance from city                                  | .028       | .0164      | .088  | .012    | .0209      | .575 | .014       | .0194      | .467  |
| Distance from main road                             | -.031      | .0362      | .098  | .027    | .0323      | .402 | -.049      | .0395      | .216  |
| Distance from input/output market                   | .004       | .0131      | .065  | -.010   | .0213      | .648 | -.008      | .0197      | .689  |
| Local market in the village<br>1. Yes 2. No.        | -.326      | .1677      | .052  | -.066   | .1995      | .741 | -.060      | .2078      | .772  |
| Drinkable water available within 60 minutes in walk | -.111      | .2378      | .642  | -.088   | .2303      | .701 | .010       | .1955      | .961  |
| Road to village. 1.Yes2. No                         | .084       | .1268      | .008  | -.159   | .1927      | .408 | .216       | .1956      | .270  |
| Crop diversity Index                                | -<br>1.172 | 1.0588     | .268  | .496    | .5378      | .357 | -<br>2.079 | 1.0268     | .043  |
| Income diversity index                              | -.251      | .0282      | .028  | .018    | .3239      | .057 | .005       | .3410      | .989  |
| Family education index                              | .0304      | .1256      | 0.137 | -.341   | .0168      | .083 |            |            |       |
| Cash crop group                                     | .010       | .0146      | .086  | -.006   | .0073      | .390 | .003       | .0072      | .211  |
| Pulses crop group                                   | .014       | .0223      | .030  | -.001   | .0210      | .965 | 1.468      | .0220      | .000  |
| Vegetables and fruits group                         | -.008      | .0288      | .791  | .041    | .0245      | .092 | .024       | .0235      | 1.014 |

**Table 5: description of main food groups**

| Main food groups                           | Main items                                                                                                                                                 |
|--------------------------------------------|------------------------------------------------------------------------------------------------------------------------------------------------------------|
| Grains, white roots and tubers             | Rice, wheat, corn products: bread, cereals, pasta, bran, wheat germ, pizza, pancakes                                                                       |
| Pulses, beans, peas and lentils            | kidney beans, pinto beans, white beans, black beans, lima beans, fava beans), dried peas (chickpeas, black-eyed peas, pigeon peas, split peas) and lentils |
| Nuts and seeds                             | Pulses, lima beans, peas, etc, soya beans, tofu, seeds, nuts, peanut butter                                                                                |
| Dairy                                      | Milk and milk products, yoghurt, cream, cheese                                                                                                             |
| Meat, poultry and fish                     | Poultry, game, beef, sheep, processed meats, Fish, shellfish, shrimp, etc                                                                                  |
| Eggs                                       | Eggs and egg products                                                                                                                                      |
| Dark green leafy vegetables                | Tomato · Carrots · Garlic · Bitter Gourd · Bottle Gourd · Cauliflower · Cucumber.                                                                          |
| Other Vitamin A-rich fruits and vegetables | Tomato, carrots, mangoes, papaya, watermelon, and others locally available vitamin A-rich fruits and vegetables                                            |
| Other vegetables                           | Lettuce, green pepper, red pepper, lady finger, cauliflower etc                                                                                            |
| Other fruits                               | Orange, banana, lemon, watermelon, guava                                                                                                                   |

**Table 6: description of socio-demographic variables**

| Variables                                | Mean  | Std. Deviation |
|------------------------------------------|-------|----------------|
| Age                                      | 45.4  | 9.67           |
| Education                                | 7.80  | 3.30           |
| Farming experience                       | 12.74 | 9.06           |
| Family size                              | 4.35  | 3.53           |
| Family structure                         | 1.57  | 1.01           |
| Distance from the city                   | 14.98 | 5.43           |
| Distance from the main road              | 2.89  | 1.25           |
| Distance from input/output market        | 12.59 | 5.36           |
| Local market in the village              | 1.04  | 0.13           |
| Drinkable water available in the village | 1.01  | 0.08           |
| Road to the village                      | 1.02  | 0.11           |

**Table 7: Livestock production of districts in Pakistan by administrative unit.**

| Districts | Cattle | buffalo | Sheep  | Goats  | Camels | Horses | Poultry |
|-----------|--------|---------|--------|--------|--------|--------|---------|
| Layyah    | 581844 | 301270  | 505287 | 571446 | 16344  | 3830   | 914458  |
| Bhakkar   | 538278 | 260788  | 459540 | 655774 | 19339  | 3615   | 1020182 |
| Khushab   | 344971 | 168385  | 167262 | 529176 | 8594   | 4708   | 581427  |
